# Supplementary material for: Marked sex differences in all-cause mortality on antiretroviral therapy in low- and middle-income countries: a systematic review and meta-analysis
Source: PubMed Central journal article supplement (PMC5103676; doi:10.7448/ias.19.1.21106), 2016-11-08
Supplement: JIAS-19-21106-s001.pdf [file JIAS-19-21106-s001.pdf]

## Appendix

### PubMed Search Query

((((((((((("developing country"[tiab] OR "developing countries"[tiab] OR "developing nation"[tiab] OR "developing nations"[tiab] OR "developing population"[tiab] OR "developing populations"[tiab] OR "developing world"[tiab] OR "less developed country"[tiab] OR "less developed countries"[tiab] OR "less developed nation"[tiab] OR "less developed nations"[tiab] OR "less developed population"[tiab] OR "less developed populations"[tiab] OR "less developed world"[tiab] OR "lesser developed country"[tiab] OR "lesser developed countries"[tiab] OR "lesser developed nation"[tiab] OR "lesser developed nations"[tiab] OR "lesser developed population"[tiab] OR "lesser developed populations"[tiab] OR "lesser developed world"[tiab] OR "under developed country"[tiab] OR "under developed countries"[tiab] OR "under developed nation"[tiab] OR "under developed nations"[tiab] OR "under developed population"[tiab] OR "under developed populations"[tiab] OR "under developed world"[tiab] OR "underdeveloped country"[tiab] OR "underdeveloped countries"[tiab] OR "underdeveloped nation"[tiab] OR "underdeveloped nations"[tiab] OR "underdeveloped population"[tiab] OR "underdeveloped populations"[tiab] OR "underdeveloped world"[tiab] OR "middle income country"[tiab] OR "middle income countries"[tiab] OR "middle income nation"[tiab] OR "middle income nations"[tiab] OR "middle income population"[tiab] OR "middle income populations"[tiab] OR "low income country"[tiab] OR "low income countries"[tiab] OR "low income nation"[tiab] OR "low income nations"[tiab] OR "low income population"[tiab] OR "low income populations"[tiab] OR "lower income country"[tiab] OR "lower income countries"[tiab] OR "lower income nation"[tiab] OR "lower income nations"[tiab] OR "lower income population"[tiab] OR "lower income populations"[tiab] OR "underserved country"[tiab] OR "underserved countries"[tiab] OR "underserved nation"[tiab] OR "underserved nations"[tiab] OR "underserved population"[tiab] OR "underserved populations"[tiab] OR "underserved world"[tiab] OR "under served country"[tiab] OR "under served countries"[tiab] OR "under served nation"[tiab] OR "under served nations"[tiab] OR "under served population"[tiab] OR "under served populations"[tiab] OR "under served world"[tiab] OR "deprived country"[tiab] OR "deprived countries"[tiab] OR "deprived nation"[tiab] OR "deprived nations"[tiab] OR "deprived population"[tiab] OR "deprived populations"[tiab] OR "deprived world"[tiab])))) OR ("poor country"[tiab] OR "poor countries"[tiab] OR "poor nation"[tiab] OR "poor nations"[tiab] OR "poor population"[tiab] OR "poor populations"[tiab] OR "poor world"[tiab] OR "poorer country"[tiab] OR "poorer countries"[tiab] OR "poorer nation"[tiab] OR "poorer nations"[tiab] OR "poorer population"[tiab] OR "poorer populations"[tiab] OR "poorer world"[tiab] OR "developing economy"[tiab] OR "developing economies"[tiab] OR "less developed economy"[tiab] OR "less developed economies"[tiab] OR "lesser developed economy"[tiab] OR "lesser developed economies"[tiab] OR "under developed economy"[tiab] OR "under developed economies"[tiab] OR "underdeveloped economy"[tiab] OR "underdeveloped economies"[tiab] OR "middle income economy"[tiab] OR "middle income economies"[tiab] OR "low income economy"[tiab] OR "low income economies"[tiab] OR "lower income economy"[tiab] OR "lower income economies"[tiab] OR "low gdp"[tiab] OR "low gnp"[tiab] OR "low gross domestic"[tiab] OR "low gross national"[tiab] OR "lower gdp"[tiab] OR "lower gnp"[tiab] OR "lower gross domestic"[tiab] OR "lower gross national"[tiab] OR lmic[tiab] OR lmic[tiab] OR "third world"[tiab] OR "lami country"[tiab] OR "lami countries"[tiab] OR "transitional country"[tiab] OR "transitional countries"[tiab])) OR (Africa[tiab] OR Asia[tiab] OR Caribbean[tiab] OR West Indies[tiab] OR South America[tiab] OR Latin America[tiab] OR Central America[tiab] OR "Atlantic Islands"[tiab] OR "Commonwealth of Independent States"[tiab] OR "Pacific Islands"[tiab] OR "Indian Ocean Islands"[tiab] OR "Eastern Europe"[tiab] OR Afghanistan[tiab] OR Albania[tiab] OR Algeria[tiab] OR Angola[tiab] OR Antigua[tiab] OR Barbuda[tiab] OR Argentina[tiab] OR Armenia[tiab] OR Armenian[tiab] OR Aruba[tiab] OR Azerbaijan[tiab] OR Bahrain[tiab] OR Bangladesh[tiab] OR Barbados[tiab] OR Benin[tiab] OR Byelarus[tiab] OR Byelorussian[tiab] OR Belarus[tiab] OR Belorussian[tiab] OR Belorussia[tiab] OR Belize[tiab] OR Bhutan[tiab] OR Bolivia[tiab] OR Bosnia[tiab] OR Herzegovina[tiab] OR Hercegovina[tiab] OR Botswana[tiab] OR Brasil[tiab] OR Brazil[tiab] OR Bulgaria[tiab] OR Burkina Faso[tiab] OR Burkina Fasso[tiab] OR Upper Volta[tiab] OR Burundi[tiab] OR Urundi[tiab] OR Cambodia[tiab] OR Khmer Republic[tiab] OR Kampuchea[tiab] OR Cameroon[tiab] OR Camerons[tiab] OR Cameron[tiab] OR Camerons[tiab] OR Cape Verde[tiab] OR Central African Republic[tiab] OR Chad[tiab] OR Chile[tiab] OR China[tiab] OR Colombia[tiab] OR Comoros[tiab] OR Comoro Islands[tiab] OR Comores[tiab] OR Mayotte[tiab] OR Congo[tiab] OR Zaire[tiab] OR Costa Rica[tiab] OR Côte d'Ivoire[tiab] OR Ivory Coast[tiab] OR Croatia[tiab] OR Cuba[tiab] OR Cyprus[tiab] OR Czechoslovakia[tiab] OR Czech Republic[tiab] OR Slovakia[tiab] OR Slovak Republic[tiab] OR Djibouti[tiab] OR French Somaliland[tiab] OR Dominica[tiab] OR Dominican Republic[tiab] OR East

Timor[tiab] OR East Timur[tiab] OR Timor Leste[tiab] OR Ecuador[tiab] OR Egypt[tiab] OR United Arab Republic[tiab] OR El Salvador[tiab] OR Eritrea[tiab] OR Estonia[tiab] OR Ethiopia[tiab] OR Fiji[tiab] OR Gabon[tiab] OR Gabonese Republic[tiab] OR Gambia[tiab] OR Gaza[tiab] OR Georgia Republic[tiab] OR Georgian Republic[tiab] OR Ghana[tiab] OR Gold Coast[tiab] OR Greece[tiab] OR Grenada[tiab] OR Guatemala[tiab] OR Guinea[tiab] OR Guam[tiab] OR Guiana[tiab] OR Guyana[tiab] OR Haiti[tiab] OR Honduras[tiab] OR Hungary[tiab] OR India[tiab] OR Maldives[tiab] OR Indonesia[tiab] OR Iran[tiab] OR Iraq[tiab] OR Isle of Man[tiab] OR Jamaica[tiab] OR Jordan[tiab] OR Kazakhstan[tiab] OR Kazakh[tiab] OR Kenya[tiab] OR Kiribati[tiab] OR Korea[tiab] OR Kosovo[tiab] OR Kyrgyzstan[tiab] OR Kirghizia[tiab] OR Kyrgyz Republic[tiab] OR Kirghiz[tiab] OR Kirgizstan[tiab] OR "Lao PDR"[tiab] OR Laos[tiab] OR Latvia[tiab] OR Lebanon[tiab] OR Lesotho[tiab] OR Basutoland[tiab] OR Liberia[tiab] OR Libya[tiab] OR Lithuania[tiab])) OR (Macedonia[tiab] OR Madagascar[tiab] OR Malagasy Republic[tiab] OR Malaysia[tiab] OR Malaya[tiab] OR Malay[tiab] OR Sabah[tiab] OR Sarawak[tiab] OR Malawi[tiab] OR Nyasaland[tiab] OR Mali[tiab] OR Malta[tiab] OR Marshall Islands[tiab] OR Mauritania[tiab] OR Mauritius[tiab] OR Agalega Islands[tiab] OR "Melanesia"[tiab] OR Mexico[tiab] OR Micronesia[tiab] OR Middle East[tiab] OR Moldova[tiab] OR Moldova[tiab] OR Moldovan[tiab] OR Mongolia[tiab] OR Montenegro[tiab] OR Morocco[tiab] OR Ifni[tiab] OR Mozambique[tiab] OR Myanmar[tiab] OR Myanma[tiab] OR Burma[tiab] OR Namibia[tiab] OR Nepal[tiab] OR Netherlands Antilles[tiab] OR New Caledonia[tiab] OR Nicaragua[tiab] OR Niger[tiab] OR Nigeria[tiab] OR Northern Mariana Islands[tiab] OR Oman[tiab] OR Muscat[tiab] OR Pakistan[tiab] OR Palau[tiab] OR Palestine[tiab] OR Panama[tiab] OR Paraguay[tiab] OR Peru[tiab] OR Philippines[tiab] OR Philipines[tiab] OR Phillipines[tiab] OR Phillippines[tiab] OR Poland[tiab] OR Portugal[tiab] OR Puerto Rico[tiab] OR Romania[tiab] OR Rumania[tiab] OR Roumania[tiab] OR Russia[tiab] OR Russian[tiab] OR Rwanda[tiab] OR Ruanda[tiab] OR Saint Kitts[tiab] OR St Kitts[tiab] OR Nevis[tiab] OR Saint Lucia[tiab] OR St Lucia[tiab] OR Saint Vincent[tiab] OR St Vincent[tiab] OR Grenadines[tiab] OR Samoa[tiab] OR Samoan Islands[tiab] OR Navigator Island[tiab] OR Navigator Islands[tiab] OR Sao Tome[tiab] OR Saudi Arabia[tiab] OR Senegal[tiab] OR Serbia[tiab] OR Montenegro[tiab] OR Seychelles[tiab] OR Sierra Leone[tiab] OR Slovenia[tiab] OR Sri Lanka[tiab] OR Ceylon[tiab] OR Solomon Islands[tiab] OR Somalia[tiab] OR Sudan[tiab] OR Suriname[tiab] OR Surinam[tiab] OR Swaziland[tiab] OR Syria[tiab] OR Syrian[tiab] OR Tajikistan[tiab] OR Tadjikistan[tiab] OR Tadjikistan[tiab] OR Tadjhik[tiab] OR Tanzania[tiab] OR Thailand[tiab] OR Togo[tiab] OR Togolese Republic[tiab] OR Tonga[tiab] OR Trinidad[tiab] OR Tobago[tiab] OR Tunisia[tiab] OR Turkey[tiab] OR Turkmenistan[tiab] OR Turkmen[tiab] OR Tuvalu[tiab] OR Uganda[tiab] OR Ukraine[tiab] OR Uruguay[tiab] OR USSR[tiab] OR Soviet Union[tiab] OR Union of Soviet Socialist Republics[tiab] OR Uzbekistan[tiab] OR Uzbek OR Vanuatu[tiab] OR New Hebrides[tiab] OR Venezuela[tiab] OR Vietnam[tiab] OR Viet Nam[tiab] OR West Bank[tiab] OR Yemen[tiab] OR Yugoslavia[tiab] OR Zambia[tiab] OR Zimbabwe[tiab] OR Rhodesia[tiab])) OR (Developing Countries[Mesh] OR Africa[Mesh:noexp] OR Africa, Northern[Mesh:noexp] OR Africa South of the Sahara[Mesh:noexp] OR Africa, Central[Mesh:noexp] OR Africa, Eastern[Mesh:noexp] OR Africa, Southern[Mesh:noexp] OR Africa, Western[Mesh:noexp] OR Asia[Mesh:noexp] OR Asia, Central[Mesh:noexp] OR Asia, Southeastern[Mesh:noexp] OR Asia, Western[Mesh:noexp] OR Caribbean Region[Mesh:noexp] OR West Indies[Mesh:noexp] OR South America[Mesh:noexp] OR Latin America[Mesh:noexp] OR Central America[Mesh:noexp] OR "Atlantic Islands"[Mesh:noexp] OR "Commonwealth of Independent States"[Mesh:noexp] OR "Pacific Islands"[Mesh:noexp] OR "Indian Ocean Islands"[Mesh:noexp] OR "Europe, Eastern"[Mesh:noexp])) OR (Afghanistan[Mesh] OR Albania[Mesh] OR Algeria[Mesh] OR American Samoa[Mesh] OR Angola[Mesh] OR "Antigua and Barbuda"[Mesh] OR Argentina[Mesh] OR Armenia[Mesh] OR Azerbaijan[Mesh] OR Bahrain[Mesh] OR "Baltic States"[Mesh] OR Bangladesh[Mesh] OR Barbados[Mesh] OR Benin[Mesh] OR "Republic of Belarus"[Mesh] OR Belize[Mesh] OR Bhutan[Mesh] OR Bolivia[Mesh] OR Bosnia-Herzegovina[Mesh] OR Botswana[Mesh] OR Brazil[Mesh] OR Bulgaria[Mesh] OR Burkina Faso[Mesh] OR Burundi[Mesh] OR Cambodia[Mesh] OR Cameroon[Mesh] OR Cape Verde[Mesh] OR Central African Republic[Mesh] OR Chad[Mesh] OR Chile[Mesh] OR China[Mesh] OR Colombia[Mesh] OR Comoros[Mesh] OR Congo[Mesh] OR Costa Rica[Mesh] OR Côte d'Ivoire[Mesh] OR Croatia[Mesh] OR Cuba[Mesh] OR Cyprus[Mesh] OR Czechoslovakia[Mesh] OR Czech Republic[Mesh] OR Slovakia[Mesh] OR Djibouti[Mesh] OR "Democratic Republic of the Congo"[Mesh] OR "Democratic People's Republic of Korea"[Mesh] OR Dominica[Mesh] OR Dominican Republic[Mesh] OR East Timor[Mesh] OR Ecuador[Mesh] OR Egypt[Mesh] OR El Salvador[Mesh] OR Eritrea[Mesh] OR Estonia[Mesh] OR Ethiopia[Mesh] OR "Equatorial Guinea"[Mesh] OR Fiji[Mesh] OR "French Guiana"[Mesh] OR Gabon[Mesh] OR Gambia[Mesh] OR "Georgia (Republic)"[Mesh] OR Ghana[Mesh] OR Greece[Mesh] OR Grenada[Mesh] OR Guatemala[Mesh] OR Guinea[Mesh] OR Guinea-Bissau[Mesh] OR Guam[Mesh] OR Guyana[Mesh] OR Haiti[Mesh] OR Honduras[Mesh] OR Hungary[Mesh] OR "Independent State of Samoa"[Mesh] OR India[Mesh] OR Indonesia[Mesh] OR Iran[Mesh] OR Iraq[Mesh] OR Jamaica[Mesh] OR Jordan[Mesh] OR

Kazakhstan[Mesh] OR Kenya[Mesh] OR Korea[Mesh] OR Kyrgyzstan[Mesh] OR Laos[Mesh] OR Latvia[Mesh] OR Lebanon[Mesh] OR Lesotho[Mesh] OR Liberia[Mesh] OR Libya[Mesh] OR Lithuania[Mesh] OR "Macedonia (Republic)"[Mesh] OR Madagascar[Mesh])) OR (Malawi[Mesh] OR Malaysia[Mesh] OR Mali[Mesh] OR Malta[Mesh] OR Mauritania[Mesh] OR Mauritius[Mesh] OR "Melanesia"[Mesh] OR Mexico[Mesh] OR Micronesia[Mesh] OR Middle East[Mesh:noexp] OR Moldova[Mesh] OR Mongolia[Mesh] OR Montenegro[Mesh] OR Morocco[Mesh] OR Mozambique[Mesh] OR Myanmar[Mesh] OR Namibia[Mesh] OR Nepal[Mesh] OR Netherlands Antilles[Mesh] OR New Caledonia[Mesh] OR Nicaragua[Mesh] OR Niger[Mesh] OR Nigeria[Mesh] OR Oman[Mesh] OR Pakistan[Mesh] OR Palau[Mesh] OR Panama[Mesh] OR Papua New Guinea[Mesh] OR Paraguay[Mesh] OR Peru[Mesh] OR Philippines[Mesh] OR Poland[Mesh] OR Portugal[Mesh] OR Puerto Rico[Mesh] OR "Republic of Korea"[Mesh] OR Romania[Mesh] OR Russia[Mesh] OR "Russia (Pre-1917)"[Mesh] OR Rwanda[Mesh] OR "Saint Kitts and Nevis"[Mesh] OR Saint Lucia[Mesh] OR "Saint Vincent and the Grenadines"[Mesh] OR Samoa[Mesh] OR Saudi Arabia[Mesh] OR Senegal[Mesh] OR Serbia[Mesh] OR Montenegro[Mesh] OR Seychelles[Mesh] OR Sierra Leone[Mesh] OR Slovenia[Mesh] OR Sri Lanka[Mesh] OR Somalia[Mesh] OR South Africa[Mesh] OR Sudan[Mesh] OR Suriname[Mesh] OR Swaziland[Mesh] OR Syria[Mesh] OR Tajikistan[Mesh] OR Tanzania[Mesh] OR Thailand[Mesh] OR Togo[Mesh] OR Tonga[Mesh] OR "Trinidad and Tobago"[Mesh] OR Tunisia[Mesh] OR Turkey[Mesh] OR Turkmenistan[Mesh] OR Uganda[Mesh] OR Ukraine[Mesh] OR Uruguay[Mesh] OR USSR[Mesh] OR Uzbekistan[Mesh] OR Vanuatu[Mesh] OR Venezuela[Mesh] OR Vietnam[Mesh] OR Yemen[Mesh] OR Yugoslavia[Mesh] OR Zambia[Mesh] OR Zimbabwe[Mesh])) AND (("Anti-Retroviral Agents"[Mesh] OR "Anti-Retroviral Agents"[Pharmacological Action] OR "ART"[tiab] OR "anti-retroviral agents"[tiab] OR "anti-retroviral treatment"[tiab] OR "anti-retroviral therapy"[tiab] OR "antiretroviral"[tiab] OR "Antiretroviral Therapy, Highly Active"[MeSH] OR "HAART"[tiab]) AND (HIV[MeSH] OR AIDS[MeSH] OR "HIV Infections"[MeSH] OR "Anti-Retroviral Agents"[MeSH] OR HIV[tw] OR HIV-1[tw] OR HIV-2[tw] OR Human immunodeficiency virus\*[tw] OR Human Immunodeficiency Virus\*[tw] OR AIDS[tw] OR Acquired Immunodeficiency Syndrome\*[tw] OR "Acquired Immune Deficiency Syndrome"[tw] OR "Acquired Immune Deficiency Syndromes"[tw] OR "Acquired Immuno-Deficiency Syndrome"[tw] OR "Acquired Immuno-Deficiency Syndromes"[tw] OR "Acquired Immuno Deficiency Syndrome"[tw] OR "Acquired Immuno Deficiency Syndromes"[tw] OR "acquired immunologic deficiency syndrome"[tw])) NOT (pediatrics[MESH] OR pediatrics[tiab] OR children[MeSH])

**Table 6: Baseline Factors Adjusted for in Mortality Hazard Ratios\***

| Author, Year      | Age | CD4 count | WHO Stage | Viral Load | BMI or Weight | Previous/Current TB | Adherence | Hemoglobin (Anemia) | Additional Factors                                                                                                                              | Ref  |
|-------------------|-----|-----------|-----------|------------|---------------|---------------------|-----------|---------------------|-------------------------------------------------------------------------------------------------------------------------------------------------|------|
| <b>Africa</b>     |     |           |           |            |               |                     |           |                     |                                                                                                                                                 |      |
| Abaasa, 2008      | ✓   |           |           |            |               |                     | ✓         |                     | Education level                                                                                                                                 | [21] |
| Alemu, 2010       |     |           |           |            |               |                     |           |                     | -                                                                                                                                               | [24] |
| Bastard, 2011     |     | ✓         |           |            |               |                     | ✓         | ✓                   | -                                                                                                                                               | [27] |
| Biadgilign, 2012  | ✓   | ✓         | ✓         |            | ✓             |                     |           |                     | Functional status <sup>a</sup> education level, employment, religion, marital status                                                            | [28] |
| Bisson, 2008      | ✓   | ✓         |           | ✓          |               |                     |           | ✓                   | -                                                                                                                                               | [30] |
| Boyles, 2011      | ✓   | ✓         |           |            |               | ✓                   |           |                     | Starting ART as inpatient, starting ART in pregnancy, pre-ART care > 6 months                                                                   | [31] |
| Brinkhof, 2009    | ✓   | ✓         | ✓         |            |               |                     |           |                     | Initial ART regimen, ART start year                                                                                                             | [33] |
| Chalamilla, 2012  |     | ✓         | ✓         |            | ✓             | ✓                   |           | ✓                   | ART regimen, patient referral site, calendar month, calendar year (age not significant in univariate analysis, so not included in multivariate) | [34] |
| Chen, 2008        | ✓   |           | ✓         |            | ✓             |                     |           |                     | -                                                                                                                                               | [35] |
| Chi, 2009         | ✓   | ✓         | ✓         |            | ✓             |                     | ✓         | ✓                   | Adherence supporter, initial ART regimen                                                                                                        | [36] |
| Chi, 2010         | ✓   | ✓         | ✓         |            | ✓             | ✓                   |           | ✓                   | Serum creatinine, third ART drug; NRTI backbone                                                                                                 | [37] |
| Chu, 2010         |     |           |           |            |               |                     |           |                     | KS stage, bleomycin chemotherapy                                                                                                                | [38] |
| Cornell, 2012     | ✓   | ✓         | ✓         | ✓          | ✓             |                     |           | ✓                   | Cohort (site)                                                                                                                                   | [40] |
| De Beaudrap, 2008 |     |           |           |            |               |                     |           |                     | -                                                                                                                                               | [42] |
| De Luca, 2012     | ✓   | ✓         | ✓         | ✓          | ✓             |                     | ✓         | ✓                   | ART start year; 6-month post-initiation CD4 count & VL                                                                                          | [43] |
| Desilva, 2009     | ✓   | ✓         |           |            |               | ✓                   |           |                     | Employment status                                                                                                                               | [45] |
| Fatti, 2010       | ✓   | ✓         | ✓         |            |               |                     |           |                     | ART start year, province, facility level                                                                                                        | [48] |
| Ford, 2010        | ✓   | ✓         |           |            |               |                     |           |                     | Pregnant at initiation                                                                                                                          | [49] |
| Geng, 2010a       | ✓   | ✓         |           |            |               |                     |           |                     | Blood pressure; central nervous system syndrome                                                                                                 | [52] |
| Greig, 2012       | ✓   |           |           |            | ✓             | ✓                   |           |                     | Severe immunosuppression, setting                                                                                                               | [54] |
| Hawkins, 2011     | ✓   | ✓         | ✓         |            | ✓             | ✓                   |           | ✓                   | Site, district, season, calendar year, antiretroviral regimen, hepatitis B and C status; alanine aminotransferase                               | [55] |

|                                      |   |   |   |   |   |   |   |                                                                                                                                                                              |       |
|--------------------------------------|---|---|---|---|---|---|---|------------------------------------------------------------------------------------------------------------------------------------------------------------------------------|-------|
| Hermans, 2012                        | ✓ | ✓ |   |   |   |   |   | ART start year                                                                                                                                                               | [56]  |
| Hoffman, 2011                        | ✓ | ✓ | ✓ | ✓ | ✓ | ✓ | ✓ | Cotrimoxazol use                                                                                                                                                             | [58]  |
| Johannessen, 2008                    |   |   | ✓ |   | ✓ |   | ✓ | ART start year, total lymphocyte count, platelet count                                                                                                                       | [59]  |
| Kassa, 2012                          | ✓ | ✓ | ✓ |   |   | ✓ |   | Functional status <sup>a</sup>                                                                                                                                               | [61]  |
| Kouanda, 2012                        | ✓ | ✓ | ✓ |   | ✓ |   |   | Profession, treatment regimen, ART start year, intensity of intervention                                                                                                     | [64]  |
| MacPherson, 2009                     | ✓ | ✓ | ✓ |   | ✓ |   |   | -                                                                                                                                                                            | [66]  |
| Mageda, 2012                         | ✓ | ✓ | ✓ |   | ✓ |   |   | Marital status, type of clinic, residence                                                                                                                                    | [67]  |
| Maman, 2012b                         | ✓ | ✓ | ✓ |   | ✓ |   |   | Updated CD4 cell count; time period of ART start                                                                                                                             | [69]  |
| Maman, 2012c                         | ✓ |   | ✓ |   | ✓ |   |   | Chronic energy deficiency                                                                                                                                                    | [70]  |
| Mutevedzi, 2011                      | ✓ | ✓ | ✓ | ✓ | ✓ | ✓ | ✓ | 3 & 12 mo analyses: estimated glomerular filtration rate; 24 mo analysis: CD4 count at 6 & 12 months, VL at 12 months; all analyses: albumin                                 | [79]  |
| Negin, 2011                          | ✓ |   |   |   |   |   |   | -                                                                                                                                                                            | [81]  |
| Odafe, 2012                          | ✓ | ✓ | ✓ |   |   |   |   | Functional status, <sup>a</sup> type of facility                                                                                                                             | [83]  |
| Ojikutu, 2008                        | ✓ | ✓ |   |   |   | ✓ |   | Employment status; oral candidiasis                                                                                                                                          | [84]  |
| Palombi, 2009                        | ✓ | ✓ |   | ✓ | ✓ |   | ✓ | Model 1. Calendar year. (Model 2 also adjusted for WHO stage, which had 39% missing data)                                                                                    | [85]  |
| Peterson, 2011                       | ✓ | ✓ | ✓ |   | ✓ |   | ✓ | ART start year, in cohort <12 months prior to ART initiation                                                                                                                 | [88]  |
| Poka-Mayap, 2013                     | ✓ | ✓ | ✓ |   | ✓ | ✓ | ✓ | Urban/rural residency; platelet count; AZT-based regimen                                                                                                                     | [89]  |
| Russell, 2010                        | ✓ | ✓ |   |   |   |   | ✓ | -                                                                                                                                                                            | [91]  |
| Sieleunou, 2009                      |   | ✓ | ✓ |   | ✓ |   | ✓ | (Age not significant in univariate analysis)                                                                                                                                 | [93]  |
| Somi, 2012                           | ✓ | ✓ | ✓ |   | ✓ |   |   | -                                                                                                                                                                            | [95]  |
| Toure, 2008                          | ✓ | ✓ | ✓ |   | ✓ |   | ✓ | ART regimen, type of HIV seropositivity, type of care center                                                                                                                 | [99]  |
| Wandeler, 2012                       | ✓ | ✓ | ✓ |   |   |   |   | ART start year, country, treatment regimen                                                                                                                                   | [101] |
| Wubshet, 2012                        |   | ✓ | ✓ |   |   | ✓ |   | Functional status <sup>a</sup>                                                                                                                                               | [103] |
| <b>Central Europe/Eastern Europe</b> |   |   |   |   |   |   |   |                                                                                                                                                                              |       |
| Tsertsvadze, 2011                    |   | ✓ |   |   |   |   |   | AID defining illness, cirrhosis; (Age injection drug use, VL, presence of anti-Hepatitis C Virus antibodies and Hepatitis B antigens not significant in univariate analysis) | [15]  |
| <b>Latin America</b>                 |   |   |   |   |   |   |   |                                                                                                                                                                              |       |
| Wolff, 2010                          | ✓ | ✓ | ✓ | ✓ |   |   |   | Third drug (Efavirenz, nevirapine, Protease                                                                                                                                  | [105] |

|                                                                  |   |   |   |   |   |   |   | inhibitor), start year of ART                                                                                                                         |
|------------------------------------------------------------------|---|---|---|---|---|---|---|-------------------------------------------------------------------------------------------------------------------------------------------------------|
| <b>Asia</b>                                                      |   |   |   |   |   |   |   |                                                                                                                                                       |
| Alvarez-Uria, 2013                                               | ✓ | ✓ |   |   |   |   |   | Disadvantaged community, Illiteracy, Homelessness, Living near a town, Poverty, Marital status [106]                                                  |
| Argemi, 2012                                                     |   |   |   |   |   |   |   | - [107]                                                                                                                                               |
| Bastard, 2013                                                    |   | ✓ |   |   | ✓ |   |   | - [108]                                                                                                                                               |
| Chen, 2013                                                       | ✓ | ✓ |   |   |   |   |   | Mode of transmission (e.g. injection drug use), marital status [110]                                                                                  |
| Fregonese, 2012                                                  | ✓ | ✓ | ✓ | ✓ |   |   | ✓ | (3-6 month analysis) -                                                                                                                                |
|                                                                  | ✓ | ✓ |   | ✓ | ✓ |   | ✓ | (6+ month analysis) ART start year, CD4 count = increase at 6 months [112]                                                                            |
| Rai, 2013                                                        | ✓ | ✓ |   |   |   |   | ✓ | Education, Household income, source of referral, opportunistic infections, distance to ART center [115]                                               |
| Tran, 2013, Vietnam                                              | ✓ | ✓ | ✓ |   | ✓ | ✓ | ✓ | Initiation year, history of injection drug use, history of unsafe sex, baseline opportunistic infections, baseline cotrimoxazol use [119]             |
| Van Griensven, 2011                                              |   | ✓ |   |   | ✓ |   | ✓ | (Age, WHO stage, ART start year were not significant in univariate analysis) [120]                                                                    |
| Zhang, 2009                                                      | ✓ | ✓ |   |   |   |   | ✓ | Marital status, infection route (sexual vs. injection drug use vs. plasma donation), alanine aminotransferase level, baseline symptoms category [122] |
| a e.g. bedridden, ambulatory, working<br>*All studies in Model 1 |   |   |   |   |   |   |   |                                                                                                                                                       |

**Table 7: Final Meta-Analysis (Model 4) Inclusions and Exclusions of Studies with Mortality Data**

| 1 <sup>st</sup> author, year | Included | Excluded | Reason                                               | HR*         | 95% CI           |
|------------------------------|----------|----------|------------------------------------------------------|-------------|------------------|
| <b>Africa</b>                |          |          |                                                      |             |                  |
| Abaasa, 2008                 |          | ✓        | LTFU ≥15%                                            | 1.48        | 0.98-2.17        |
| Ahonkhai, 2012               |          | ✓        | No HR; Odds ratio only                               |             |                  |
| Alamo, 2012                  |          | ✓        | No HR; Crude measure only                            |             |                  |
| Alemu, 2010                  |          | ✓        | Moderate quality; LTFU ≥15%                          | 1.22        | 0.58-2.56        |
| Alibhai, 2010                |          | ✓        | No HR; Crude measure only                            |             |                  |
| Balcha, 2010                 |          | ✓        | No HR; Crude measure only                            |             |                  |
| <b>Bastard, 2011</b>         | ✓        |          | <b>High quality; LTFU &lt;15%</b>                    | <b>2.13</b> | <b>1.19-3.85</b> |
| <b>Biadgilign, 2012</b>      | ✓        |          | <b>High quality; LTFU &lt;15%</b>                    | <b>0.86</b> | <b>0.5-1.47</b>  |
| Birbeck, 2011                |          | ✓        | No HR; Odds ratio only                               |             |                  |
| Bisson, 2008                 |          | ✓        | LTFU >15%                                            | 1.74        | 1.05-2.87        |
| <b>Boyles, 2011</b>          | ✓        |          | <b>High quality; LTFU &lt;15%</b>                    | <b>0.83</b> | <b>0.60-1.15</b> |
| Brennan, 2013                |          | ✓        | No HR; relative risk ratio only                      |             |                  |
| Brinkhof, 2009               |          | ✓        | LTFU ≥15%                                            | 1.19        | 1.01-1.41        |
| Chalamilla, 2012             |          | ✓        | LTFU not reported                                    | 1.19        | 1.07-1.32        |
| Chen, 2008                   |          | ✓        | LTFU ≥15%                                            | 1.70        | 1.35-2.15        |
| Chi, 2009                    |          | ✓        | LTFU ≥15%                                            | 1.30        | 1.10-1.50        |
| Chi, 2010                    |          | ✓        | LTFU ≥15%                                            | 1.82        | 1.47-2.26        |
| <b>Chu, 2010</b>             | ✓        |          | <b>High quality; LTFU &lt;15%</b>                    | <b>0.98</b> | <b>0.73-1.31</b> |
| Cornell, 2009                |          | ✓        | Cohort also represented in Cornell 2012 <sup>a</sup> |             |                  |
|                              |          |          | <b>High quality; LTFU &lt;15%</b>                    | <b>1.10</b> | <b>0.93-1.31</b> |
| <b>Cornell, 2012</b>         | ✓        |          |                                                      | <b>1.36</b> | <b>1.05-1.78</b> |
|                              |          |          |                                                      | <b>1.39</b> | <b>0.94-2.06</b> |
|                              |          |          |                                                      | <b>1.35</b> | <b>0.76-2.38</b> |
| Dalal, 2008                  |          | ✓        | No HR; Crude measure only                            |             |                  |
| <b>De Beudrap, 2008</b>      | ✓        |          | <b>0-6 month HR: High quality; LTFU &lt;15%</b>      | <b>0.97</b> | <b>0.47-2.00</b> |
|                              |          | ✓        | 7-84 month HR: Excluded, LTFU ≥15%                   | <b>1.45</b> | <b>0.86-2.38</b> |
| <b>De Luca, 2012</b>         | ✓        |          | <b>High quality; LTFU &lt;15%</b>                    | <b>1.76</b> | <b>1.11-2.80</b> |
| Deribe, 2013                 |          | ✓        | No HR; Odds ratio only                               |             |                  |
| <b>Desilva, 2009</b>         | ✓        |          | <b>High quality; LTFU &lt;15%</b>                    | <b>1.76</b> | <b>1.14-2.72</b> |
| Ekouevi, 2010                |          | ✓        | Provides combination only of mortality plus LTFU     |             |                  |
| Evans, 2012                  |          | ✓        | Cohort included in Cornell 2012 <sup>a</sup>         |             |                  |
| <b>Fatti, 2010</b>           | ✓        |          | <b>High quality; LTFU &lt;15%</b>                    | <b>1.14</b> | <b>1.00-1.30</b> |

|                          |   |                                                                                                                                |             |                  |
|--------------------------|---|--------------------------------------------------------------------------------------------------------------------------------|-------------|------------------|
| Ford, 2010               | ✓ | LTFU ≥15%                                                                                                                      | 0.90        | 0.34-2.38        |
| Fox, 2010                | ✓ | Cohort also represented in Cornell 2012 <sup>a</sup>                                                                           |             |                  |
| Fox, 2012                | ✓ | Cohort also represented in Cornell 2012 <sup>a</sup>                                                                           |             |                  |
| Franke, 2011             | ✓ | Entire sample had current tuberculosis                                                                                         |             |                  |
| Geng, 2010a              | ✓ | LTFU ≥15%                                                                                                                      | 1.54        | 0.53-4.12        |
| Geng, 2010b              | ✓ | Cohort also represented in Geng 2010a <sup>a</sup> ; of 3 HRs reported with 3 analyses, chose to include the one in the middle |             |                  |
| Greig, 2012              | ✓ | LTFU % not reported                                                                                                            | 1.20        | 1.01-1.41        |
| Hawkins, 2011            | ✓ | LTFU ≥15%                                                                                                                      | 1.19        | 1.05-1.30        |
| <b>Hermans, 2012</b>     | ✓ | <b>High quality; LTFU &lt;15%</b>                                                                                              | <b>1.41</b> | <b>1.12-1.77</b> |
| Hoffmann, 2010           | ✓ | Cohort also represented in Hoffmann 2011 <sup>a</sup> ; smaller n                                                              |             |                  |
| Hoffmann, 2011           | ✓ | LTFU ≥15%                                                                                                                      | 1.20        | 1.00-1.30        |
| <b>Johannessen, 2008</b> | ✓ | <b>High quality; LTFU &lt;15%</b>                                                                                              | <b>1.60</b> | <b>1.00-2.57</b> |
| Karstaedt, 2012          | ✓ | No HR; Crude measure only                                                                                                      |             |                  |
| <b>Kassa, 2012</b>       | ✓ | <b>High quality; LTFU &lt;15%</b>                                                                                              | <b>1.07</b> | <b>0.84-1.36</b> |
| Kebebew, 2012            | ✓ | No HR; Crude measure only                                                                                                      |             |                  |
| Kipp, 2012               | ✓ | No HR; Crude measure only                                                                                                      |             |                  |
| <b>Kouanda, 2012</b>     | ✓ | <b>High quality; LTFU &lt;15%</b>                                                                                              | <b>1.33</b> | <b>1.05-1.68</b> |
| Lowrance, 2009           | ✓ | No HR; Odds ratio only                                                                                                         |             |                  |
| <b>MacPherson, 2009</b>  | ✓ | <b>High quality; LTFU &lt;15%</b>                                                                                              | <b>1.63</b> | <b>1.12-2.36</b> |
| Mageda, 2012             | ✓ | LTFU not reported                                                                                                              | 4.71        | 2.00-11.05       |
| Maman, 2012a             | ✓ | No HR; Crude measure only                                                                                                      |             |                  |
| Maman, 2012b             | ✓ | LTFU not reported                                                                                                              |             |                  |
| <b>Maman, 2012c</b>      | ✓ | <b>High quality; LTFU &lt;15%</b>                                                                                              | <b>1.36</b> | <b>0.93-2.00</b> |
| Maskew, 2012             | ✓ | Cohort also represented in Cornell 2012 <sup>a</sup>                                                                           |             |                  |
| Maskew, 2013             | ✓ | Cohort also represented in Cornell 2012 <sup>a</sup>                                                                           |             |                  |
| Massaquoi, 2009          | ✓ | No HR; Crude measure only                                                                                                      |             |                  |
| Moore, 2011              | ✓ | No HR; Crude measure only                                                                                                      |             |                  |
| Mossdorf, 2011           | ✓ | Provides combination only of mortality plus LTFU                                                                               |             |                  |
| Mosha, 2013              | ✓ | No HR; Crude measure only                                                                                                      |             |                  |
| Mujugira, 2009           | ✓ | Entire sample was only sickest patients (CD4 <50)                                                                              |             |                  |
| Murphy, 2010             | ✓ | No HR; Odds ratio only                                                                                                         |             |                  |
| Mutevedzi, 2010          | ✓ | Cohort also represented in Mutevedzi 2011                                                                                      |             |                  |



|                                    |   |                                                      |             |                  |
|------------------------------------|---|------------------------------------------------------|-------------|------------------|
|                                    |   | <b>High quality; LTFU &lt;15%</b>                    | <b>1.64</b> | <b>1.32-2.03</b> |
|                                    |   |                                                      | <b>1.84</b> | <b>1.06-3.17</b> |
| <b>Mutevedzi, 2011</b>             | ✓ |                                                      | <b>1.40</b> | <b>1.09-1.80</b> |
|                                    |   |                                                      | <b>1.33</b> | <b>0.73-2.41</b> |
|                                    |   |                                                      | <b>1.95</b> | <b>1.46-2.57</b> |
| Mzileni, 2008                      | ✓ | No HR; Crude measure only                            |             |                  |
| Negin, 2011                        | ✓ | LTFU ≥15%                                            | 1.92        | 1.67-2.17        |
| Nglazi, 2011                       | ✓ | Cohort also represented in Cornell 2012 <sup>a</sup> |             |                  |
| Odafe, 2012                        | ✓ | LTFU ≥15%                                            | 1.29        | 0.89-1.86        |
| <b>Ojikutu, 2008</b>               | ✓ | <b>High quality; LTFU &lt;15%</b>                    | <b>1.33</b> | <b>0.73-2.50</b> |
| <b>Palombi, 2009</b>               | ✓ | <b>High quality; LTFU &lt;15%; Model 1 used</b>      | <b>1.96</b> | <b>1.59-2.50</b> |
| Palombi, 2010                      | ✓ | Cohort also represented in Palombi 2009 <sup>a</sup> | -           | -                |
| Peltzer, 2011                      | ✓ | No HR; relative risk only                            |             |                  |
| <b>Peterson, 2011</b>              | ✓ | <b>High quality; LTFU &lt;15%</b>                    | <b>4.9</b>  | <b>2.5-10.8</b>  |
|                                    |   |                                                      | <b>2.50</b> | <b>1.20-5.60</b> |
| Poka-Mayap, 2013                   | ✓ | LTFU ≥15%                                            | 2.15        | 1.34-3.45        |
| Rougemont, 2009                    | ✓ | No HR; Odds ratio only                               |             |                  |
| <b>Russell, 2010</b>               | ✓ | <b>High quality; LTFU &lt;15%</b>                    | <b>1.15</b> | <b>0.83-1.59</b> |
| Schoni-Affolter, 2011              | ✓ | No HR; Crude measure only                            |             |                  |
| <b>Sieleunou, 2009</b>             | ✓ | <b>High quality; LTFU &lt;15%</b>                    | <b>1.73</b> | <b>1.37-2.19</b> |
| Siika, 2010                        | ✓ | Case-control study                                   |             |                  |
| Somi, 2012                         | ✓ | LTFU ≥15%                                            | 1.70        | 1.61-1.79        |
| Steele, 2011                       | ✓ | No HR: relative risk ratio only                      |             |                  |
| Sunpath, 2012                      | ✓ | Entire sample had current tuberculosis               |             |                  |
| Taylor-Smith, 2010                 | ✓ | No HR: relative risk ratio only                      |             |                  |
| <b>Toure, 2008</b>                 | ✓ | <b>High quality; LTFU &lt;15%</b>                    | <b>1.52</b> | <b>1.29-1.80</b> |
| Van Cutsem, 2011                   | ✓ | Cohort also represented in Cornell 2012 <sup>a</sup> |             |                  |
| Wandeler, 2012                     | ✓ | LTFU ≥15%                                            | 1.45        | 1.25-1.70        |
| Weigel, 2011                       | ✓ | Cross-sectional study design; Odds ratio only        |             |                  |
| Wubshet, 2012                      | ✓ | LTFU ≥15%                                            | 3.26        | 2.19-4.88        |
| Zachariah, 2009                    | ✓ | No HR; Odds ratio only                               |             |                  |
| <b>Central Asia/Eastern Europe</b> |   |                                                      |             |                  |
| <b>Tsertsvadze, 2011</b>           | ✓ | <b>High quality; LTFU &lt;15%</b>                    | <b>1.96</b> | <b>1.19-3.24</b> |
| <b>Latin America</b>               |   |                                                      |             |                  |
| <b>Wolff, 2010</b>                 | ✓ | <b>High quality; LTFU &lt;15%</b>                    | <b>1.24</b> | <b>0.93-1.64</b> |

| <b>Asia</b>                |   |   |                                                       |             |                   |
|----------------------------|---|---|-------------------------------------------------------|-------------|-------------------|
| Alvarez-Uria, 2013         | ✓ |   | LTFU ≥15%                                             | 1.53        | 1.21-1.92         |
| <b>Argemi, 2012</b>        | ✓ |   | <b>High quality; LTFU &lt;15%</b>                     | <b>1.28</b> | <b>0.88-1.88</b>  |
| <b>Bastard, 2013</b>       | ✓ |   | <b>High quality; LTFU &lt;15%</b>                     | <b>0.84</b> | <b>0.49-1.45</b>  |
|                            |   |   |                                                       | <b>5.89</b> | <b>2.27-14.29</b> |
| Bhowmik, 2012              |   | ✓ | No HR; Crude measure only                             |             |                   |
| <b>Chen, 2013</b>          | ✓ |   | <b>High quality; LTFU &lt;15%</b>                     | <b>2.10</b> | <b>1.20-3.50</b>  |
| Dou, 2011                  |   | ✓ | Cohort also represented in Zhang 2009 <sup>a</sup>    |             |                   |
| <b>Fregonese, 2012</b>     | ✓ |   | <b>High quality; LTFU &lt;15%</b>                     | <b>1.50</b> | <b>0.70-3.10</b>  |
|                            |   |   |                                                       | <b>2.40</b> | <b>1.20-4.80</b>  |
| Kumarasamy, 2008           |   | ✓ | No HR; Crude measure only                             |             |                   |
| Limmahakhun, 2012          |   | ✓ | No HR; Crude measure only                             |             |                   |
| <b>Rai, 2013</b>           | ✓ |   | <b>High quality; LTFU &lt;15%</b>                     | <b>2.80</b> | <b>1.60-4.90</b>  |
| Sabapathy, 2012            |   | ✓ | Provides combination only of mortality plus LTFU      |             |                   |
| Susaengrat, 2011           |   | ✓ | No HR; Crude measure only                             |             |                   |
| Thai, 2009                 |   | ✓ | Provides combination only of mortality plus LTFU      |             |                   |
| Tran, 2013                 |   | ✓ | LTFU ≥15%                                             | 1.85        | 1.18-2.94         |
| <b>van Griensven, 2011</b> | ✓ |   | <b>High quality; LTFU &lt;15%</b>                     | <b>2.08</b> | <b>1.35-3.23</b>  |
|                            |   |   |                                                       | <b>1.72</b> | <b>1.01-2.94</b>  |
| Zhang, 2008                |   | ✓ | Cohort also represented in Zhang 2009 <sup>a</sup>    |             |                   |
| <b>Zhang, 2009</b>         | ✓ |   | <b>High quality; LTFU &lt;15%</b>                     | <b>1.40</b> | <b>1.30-1.50</b>  |
| Zhang, 2012                |   | ✓ | Cohort also represented in Zhang 2009 <sup>a</sup>    |             |                   |
| Brinkhof, 2008             |   | ✓ | Cohort also represented in Brinkhof 2009 <sup>a</sup> |             |                   |
| Wandel, 2008               |   | ✓ | HRs reported incompletely; not useable in MA          |             |                   |

\*HRs listed here were considered in sensitivity analyses; **Bold** studies were included in the final model; For studies that reported HR females vs. males, the reciprocals were calculated and are reported in this table

<sup>a</sup>Overlap of cohorts determined through review of description in studies' methods sections, e.g. follow-up months/years, sample size, name of cohort, sites and settings, and co-authorship

1 **Figure 3: Funnel Plot of Included Studies (Model 4)**

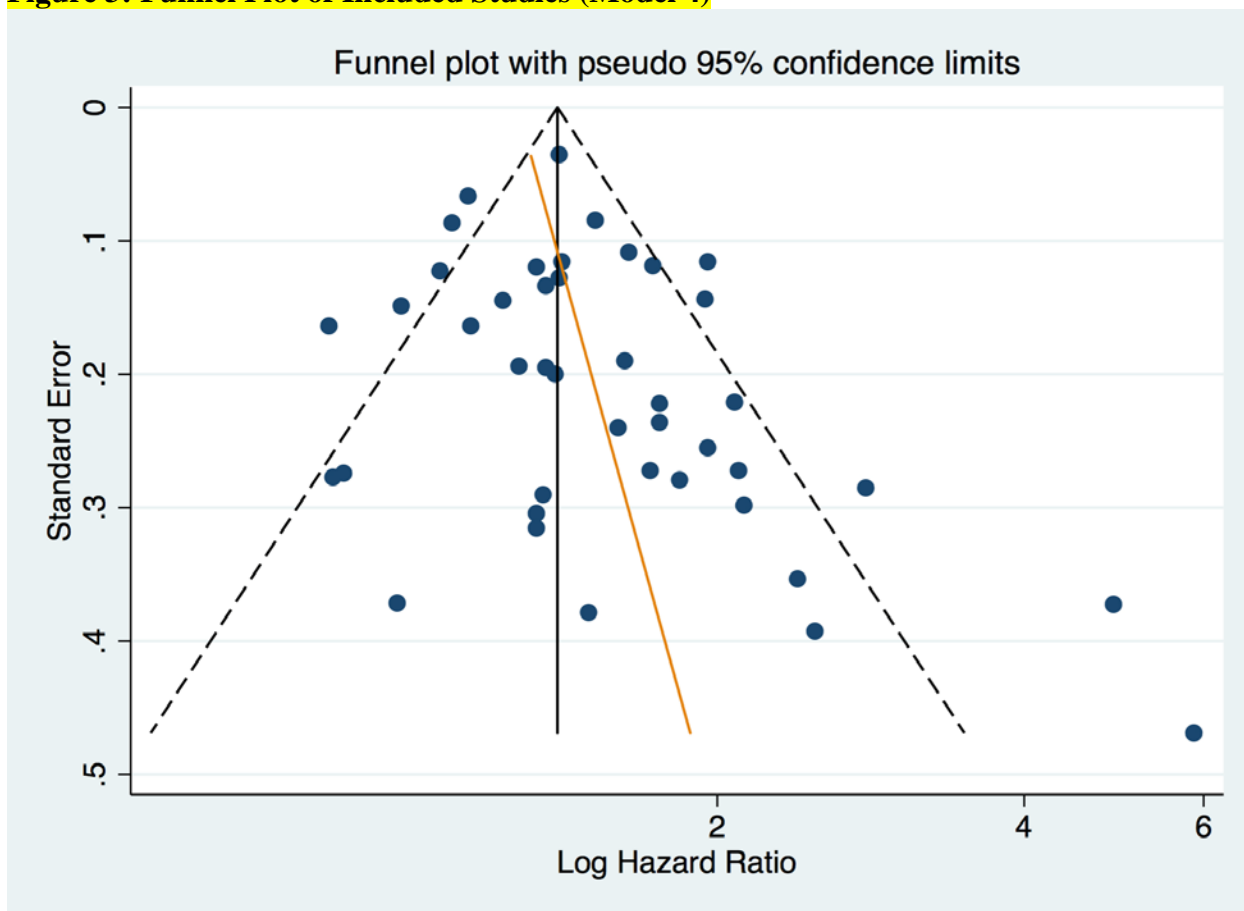

2
